# Supplementary material for: Role of Polymeric Coating on Metallic Foams to Control the Aeroacoustic Noise Reduction of Airfoils with Permeable Trailing Edges
Source: MDPI journal article supplement (doi:10.3390/ma12071087), 2019-04-02
Supplement: s1 [file s1]

# Supplementary Materials: Role of Polymeric Coating on Metallic Foams to Control the Aeroacoustic Noise Reduction of Airfoils with Permeable Trailing Edges

Reza Hedayati <sup>1,\*</sup>, Alejandro Rubio Carpio <sup>2</sup>, Salil Luesutthiviboon <sup>2</sup>, Daniele Ragni <sup>3</sup>,  
Francesco Avallone <sup>3</sup>, Damiano Casalino <sup>3</sup> and Sybrand van der Zwaag <sup>1</sup>

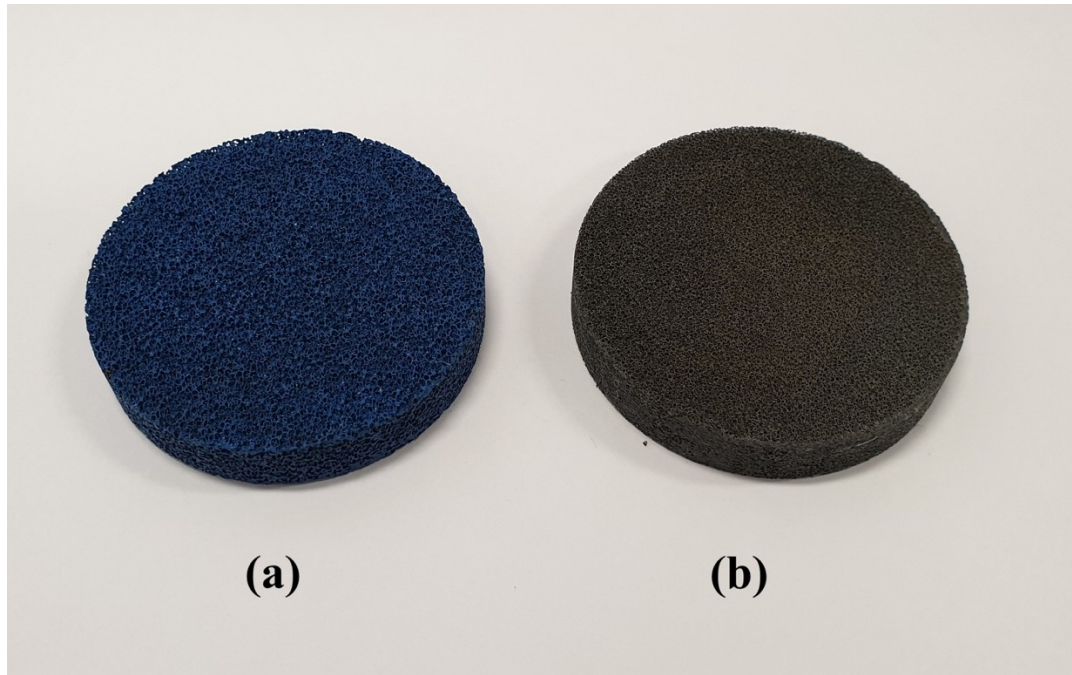

**Figure S1.** Examples of disks used for characterization of the permeability of (a) coated and (b) uncoated metal foams.
